# Supplementary material for: Electrical Brain Responses to an Auditory Illusion and the Impact of Musical Expertise
Source: PLoS One. 2015 Jun 12;10(6):e0129486. doi: 10.1371/journal.pone.0129486 (PMC4466486; doi:10.1371/journal.pone.0129486)
Supplement: S1 File — Figure A: Normalized SSRs in each frequency band across all participants, error bars indicate 99% confidence intervals. A significant effect was observed during alpha-BB stimulation. Figure B: Cross-frequency responses against BB stimulations, error bars indicate 99% confidence intervals. A significant enhancement of alpha-EEG power during delta-BB stimulation was found. (DOCX) [file pone.0129486.s001.docx]

**Electrical Brain Responses to an Auditory Illusion**

**and the Impact of Musical Expertise**

**Christos I. Ioannou1,2, Ernesto Pereda3,4, Job P. Lindsen1, Joydeep Bhattacharya1,***

1Department of Psychology, Goldsmiths, University of London, London, United Kingdom

2Institute of Music Physiology and Musicians' Medicine, Hannover University of Music, Drama and Media, Hanover, Germany

3Electrical Engineering and Bioengineering Group, Department of Industrial Engineering, University of La Laguna, Tenerife, Spain

4Institute of Biomedical Technology (CIBICAN), University of La Laguna, Tenerife, Spain

*j.bhattacharya@gold.ac.uk

**Additional Power Analysis**

We calculated normalized SSRs for all five EEG frequency bands (Figure A). Any value systematically larger than zero would suggest a significant frequency following response for that frequency band specific BB stimulation. Five separate one-sample *t*-tests were conducted (Bonferroni-corrected *P*, *Pcorr* = 0.01) and only the alpha-BB revealed a significant effect in its SSR. Although some of the effect sizes of the SSRs in other frequency bands were considerable (i.e. delta-BB and gamma-BB), these effects turned out to be non-significant (*P* > *Pcorr*) due to large variability across participants.


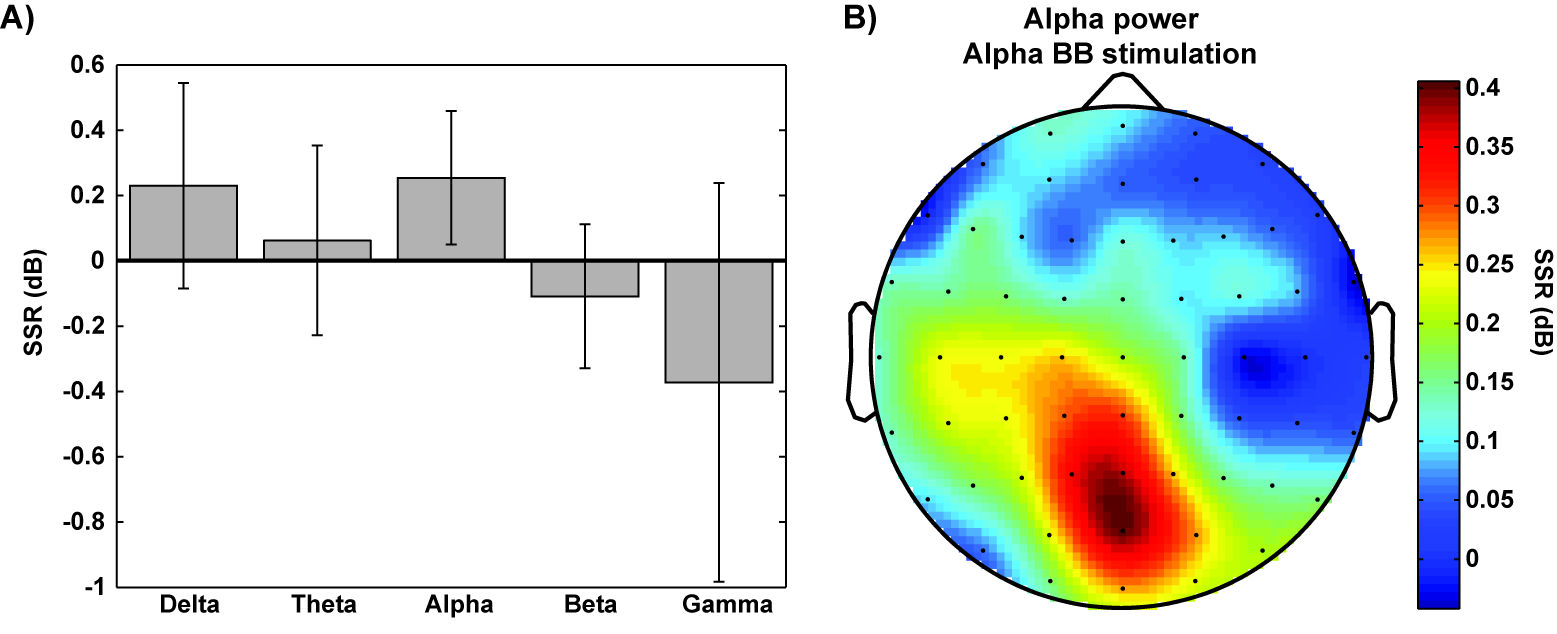


**Figure A**. Normalized SSRs in each frequency band across all participants, error bars indicate 99% confidence intervals. A significant effect was observed during alpha-BB stimulation.

Next we investigated the cross-frequency responses against BB stimulation and the results are shown in Figure B. For each EEG frequency band specific BB stimulation, we conducted four separate one-sample *t*-tests (*Pcorr* = 0.0125). The only significant effect was found in the alpha-EEG power for low frequency delta-BB stimulation (*t*31 = 2.67, *P* = 0.012 < *Pcorr*, *d* = .47); for BB stimulation at the rest of the frequencies, we did not find any cross frequency effect surviving the Bonferroni-corrected level of significance.


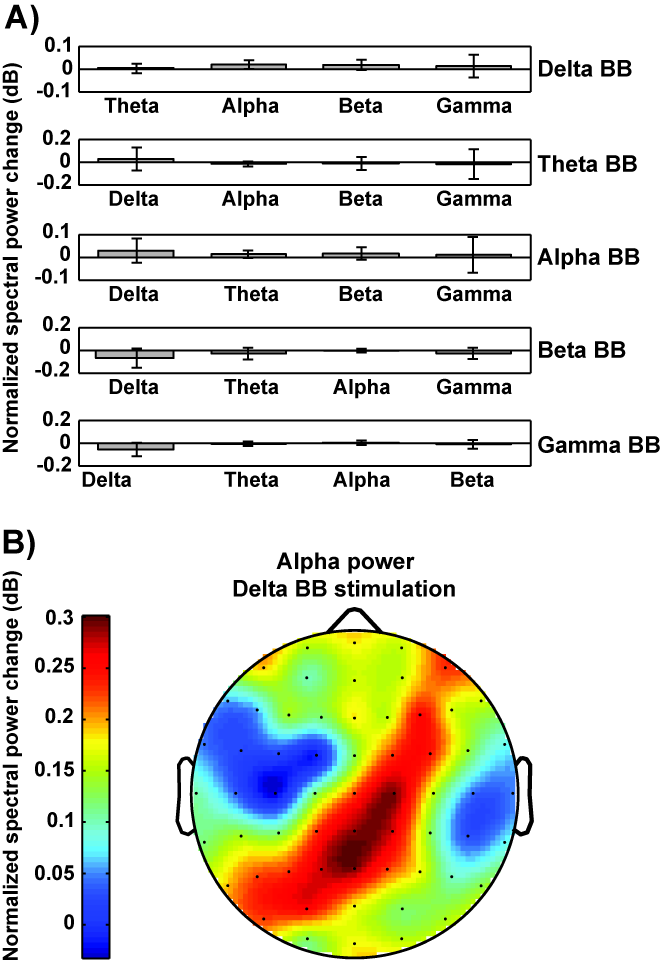


**Figure B.** Cross frequency responses against BB stimulations, error bars indicate 99% confidence intervals. A significant enhancement of alpha-EEG power during delta-BB stimulation was found.
